# Supplementary material for: Photocatalytic nitrogen fixation of metal–organic frameworks (MOFs) excited by ultraviolet light: insights into the nitrogen fixation mechanism of missing metal cluster or linker defects
Source: Royal Society of Chemistry journal article supplement (doi:10.1039/d1nr00697e), 2021-01-01
Supplement: d1nr00697e1.pdf [file d1nr00697e1.pdf]

## **Supporting Information for**

### **Photocatalytic nitrogen fixation of metal-organic frameworks (MOFs) excited by ultraviolet light: Insights into the nitrogen fixation mechanism of missing metal cluster or linker defects**

Wanguo Gao, Xiaoman Li\*, Xu Zhang, Senda Su, Shijian Luo, Rong Huang, Yuan Jing and  
Min Luo\*

State Key Laboratory of High-efficiency Utilization of Coal and Green Chemical Engineering,  
School of Chemistry and Chemical Engineering, Ningxia University, Yinchuan, Ningxia,  
750021, P.R.China

\*Corresponding author: Min Luo [luominjy@nxu.edu.cn](mailto:luominjy@nxu.edu.cn);

Xiaoman Li [lixm2017@nxu.edu.cn](mailto:lixm2017@nxu.edu.cn)

---

## Content

The CV curves patterns of UiO-66-fresh and UiO-66-UV-vis.....**Fig.**

**S1**

SEM and TEM images of UiO-66-UV-vis.....**Fig. S2**

The photo of UiO-66-fresh and UiO-66-UV-vis.....**Fig. S3**

High performance liquid chromatography (HPLC) data.....**Fig. S4**

Standard titration method for determination of  $\text{HCO}_3^-$  or  $\text{CO}_3^{2-}$ .....**Fig. S5**

XRD and UV-vis DRS of UiO-66-UV-vis-ethanol and UiO-66-fresh.....**Fig.**

**S6**

UV-vis absorption spectra and Calibration curve.....**Fig. S7**

Ion chromatograms data.....**Fig. S8**

$\text{NH}_4^+$  production rate of activated UiO-66 along with the reaction time.....**Fig. S9**

UV-vis absorption spectra and Calibration curve.....**Fig. S10**

$\text{N}_2\text{H}_4$  detection.....**Fig. S11**

Comparison of the sample structure.....**Fig. S12**

The CV curves patterns.....**Fig. S13**

EIS of UiO-66-fresh and UiO-66-UV-vis-5th.....**Fig. S14**

LSV spectra and photocurrent spectra.....**Fig. S15**

$\text{N}_2$ -TPD spectra.....**Fig. S16**

$\text{N}_2$  adsorption-desorption isotherms and pore size distribution curves.....**Fig. S17**

The UV-vis DRS.....**Fig.**

---

**S18**

XRD pattern of UiO-66-ideal.....**Figure S19**

SEM and TEM images of UiO-66-ideal.....**Figure S20**

Comparison of physical properties of the samples.....**Table S1**

Comparison of nitrogen photofixation rate.....**Table**

**S2**

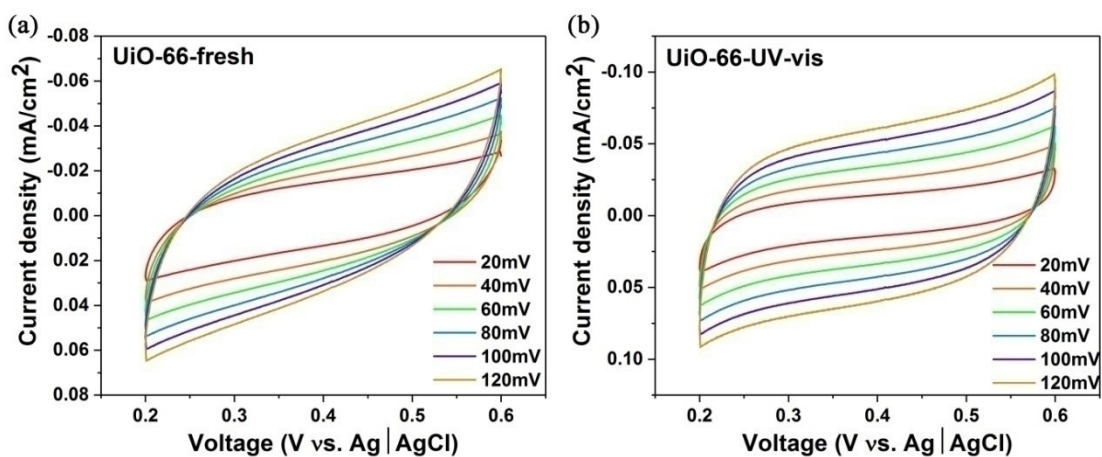

**Figure S1.** The cyclic voltammetry (CV) curves patterns of (a) UiO-66-fresh and (b) UiO-66-UV-vis at the scan rates range from 20 to 120 mV/s.

In the typical ECSA test, the surface area of a material is analyzed rely on electrochemical double layer capacitance ( $C_{dl}$ ), which could be performed by cyclic voltammetry (CV). Therefore, the  $C_{dl}$  values were derived from CV curves using the halves of the positive current density differences at the center point of their potential ranges.

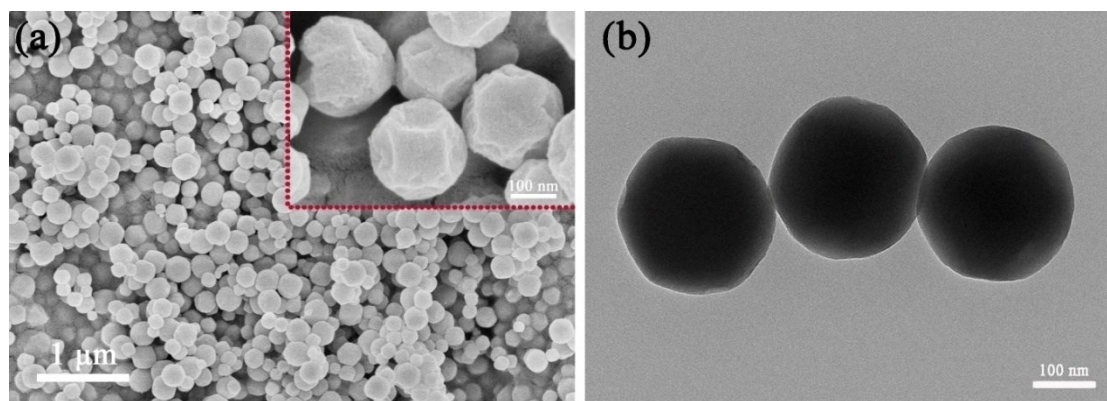

**Figure S2.** (a) SEM images and (b) TEM images of UiO-66-UV-vis.

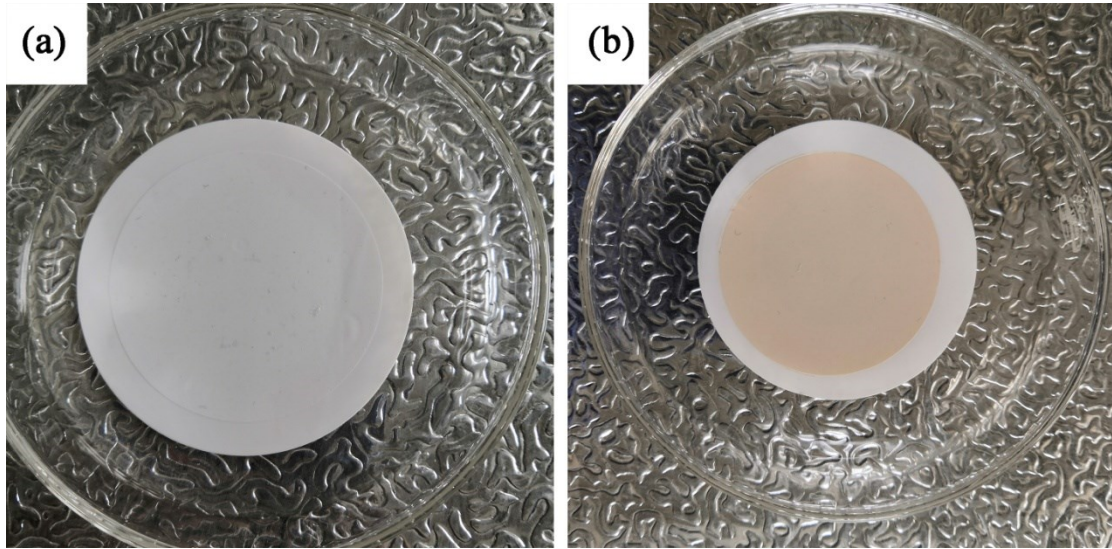

**Figure S3.** The photo of (a) UiO-66-fresh and (b) UiO-66-UV-vis.

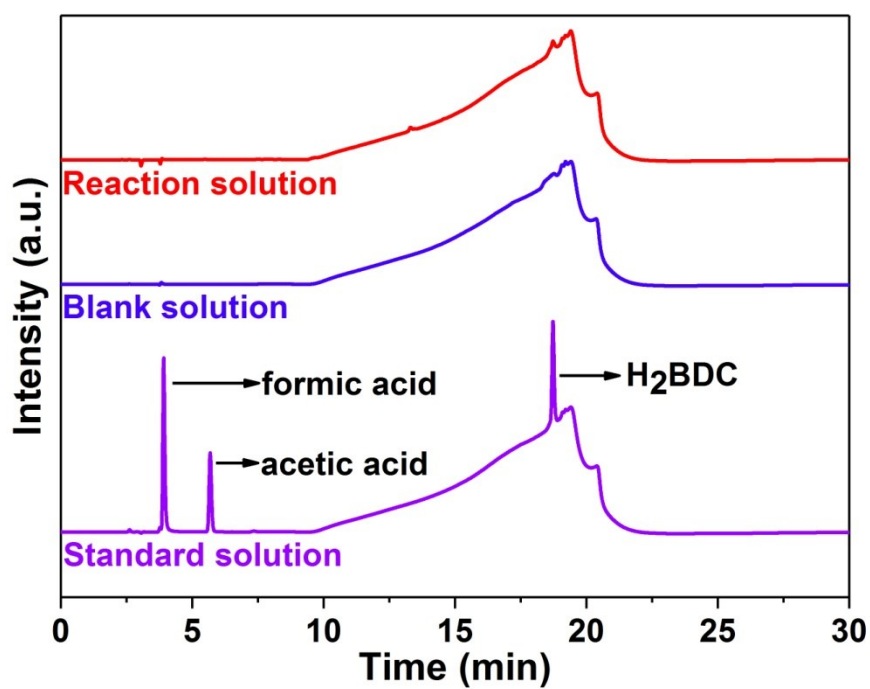

**Figure S4.** High performance liquid chromatography (HPLC) spectrum of the first photocatalytic solution.

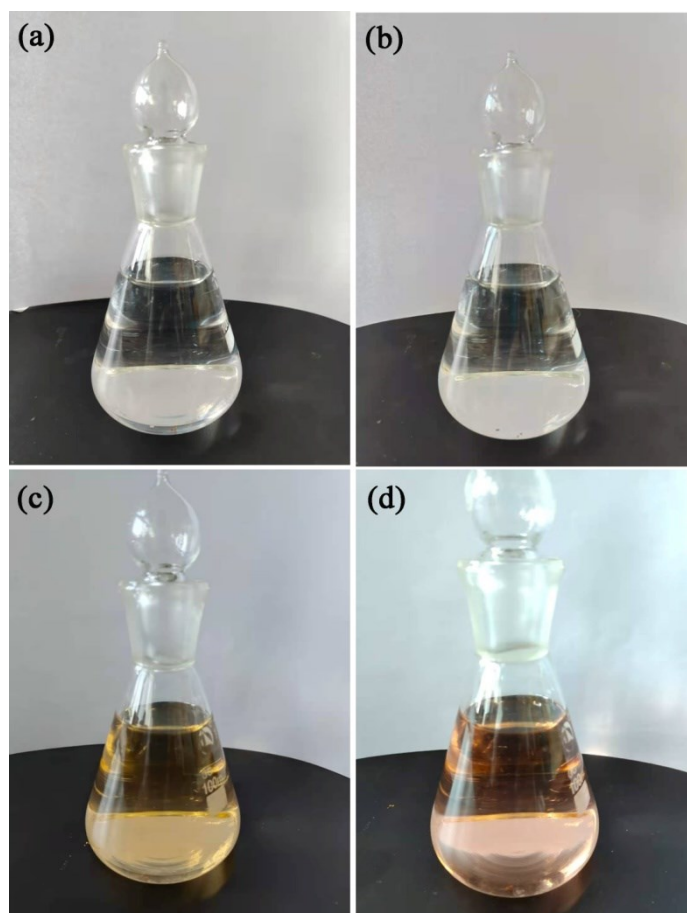

**Figure S5.** Standard titration method for determination of  $\text{HCO}_3^-$  or  $\text{CO}_3^{2-}$ : (a) adding phenolphthalein indicator (colorless), (b) not adding hydrochloric acid (colorless), (c) adding methyl orange indicator (orange-yellow), and (d) adding hydrochloric acid (orange-red).



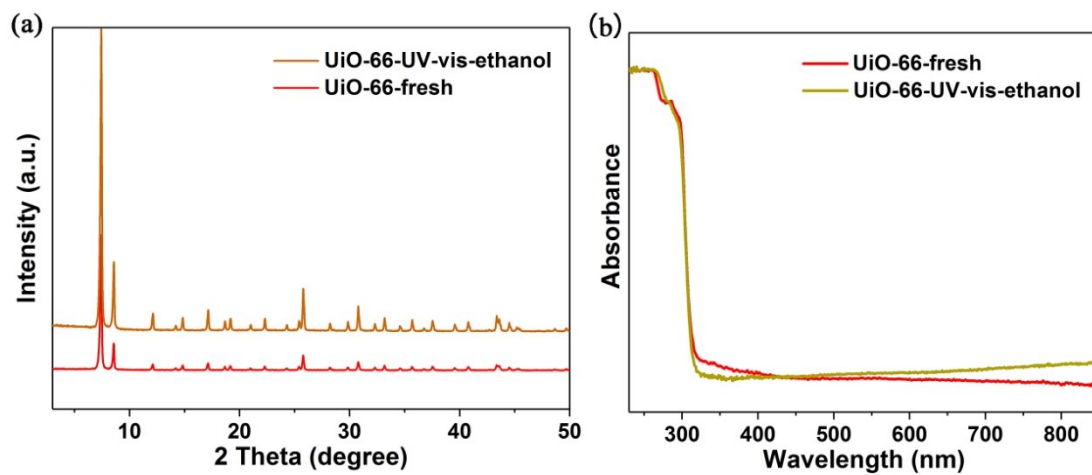

**Figure S6.** XRD and UV-vis DRS of UiO-66-UV-vis-ethanol and UiO-66-fresh.

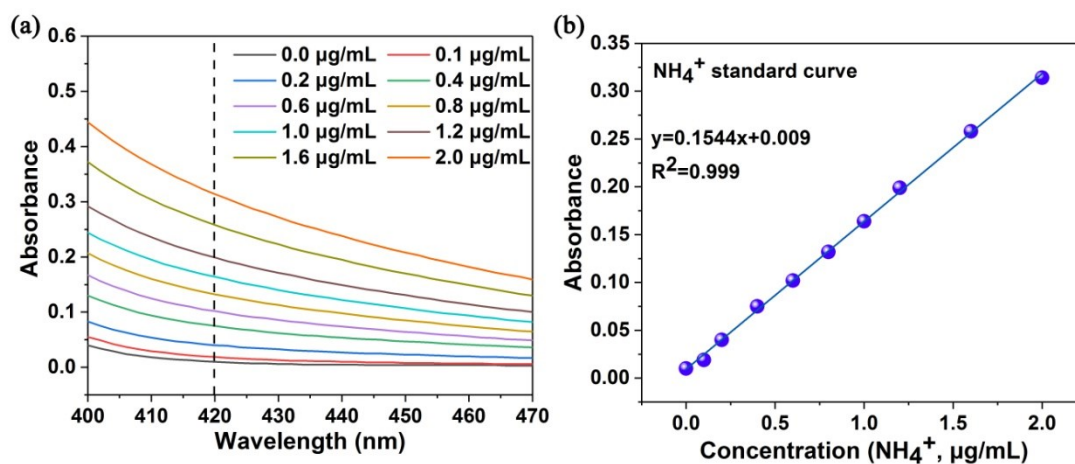

**Figure S7.** (a) UV-Vis absorption curves of different concentrations of  $\text{NH}_4^+$  ions tested by Nessler's reagent method, (b) A calibration curve used to estimate the concentrations of  $\text{NH}_4^+$  ions.

The fitting curve ( $y = 0.1544x + 0.009$ ,  $R^2 = 0.999$ ) shows good linear relationship between the absorbance value and the  $\text{NH}_4^+$  concentration.

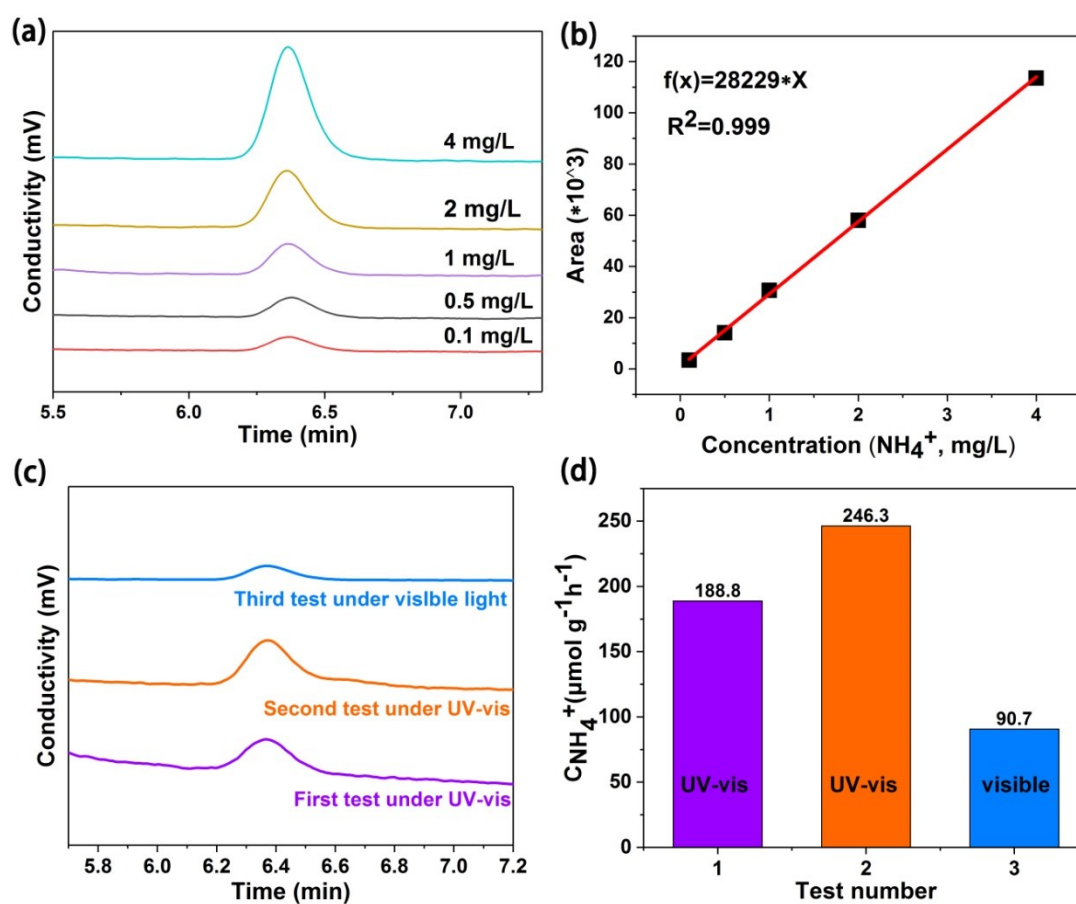

**Figure S8.** (a) Ion chromatograms of  $\text{NH}_4^+$  with different concentrations in ultrapure water, (b) A calibration curve, (c) Ion chromatogram data for the solution at different light irradiation under  $\text{N}_2$  ambient potentials, and (d)  $\text{NH}_3$  yields calculated by ion chromatography.

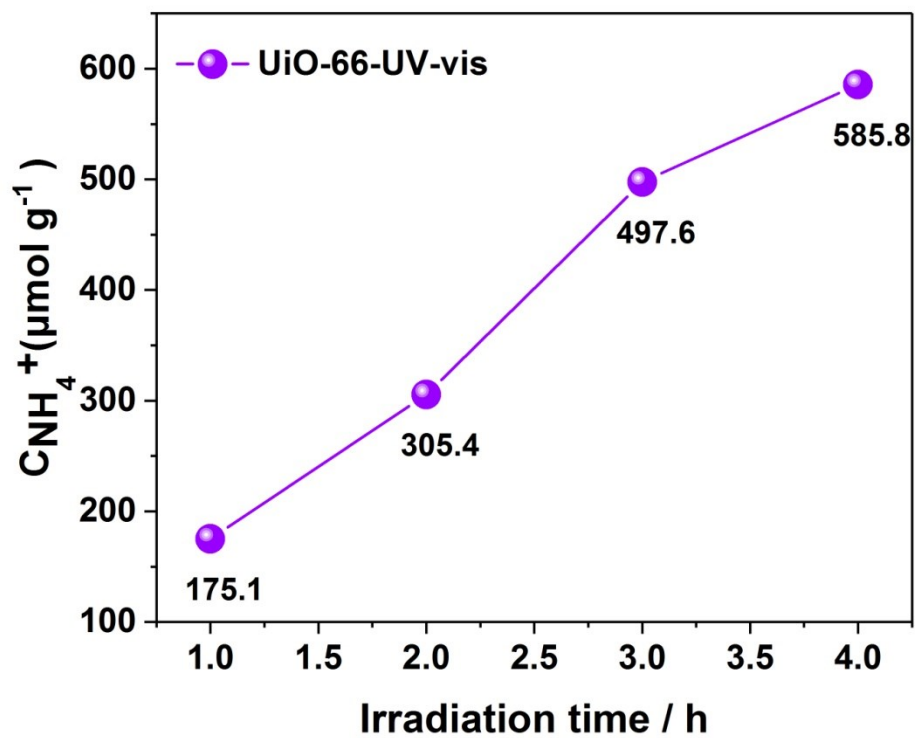

**Figure S9.**  $\text{NH}_4^+$  production rate of activated UiO-66 along with the reaction time.

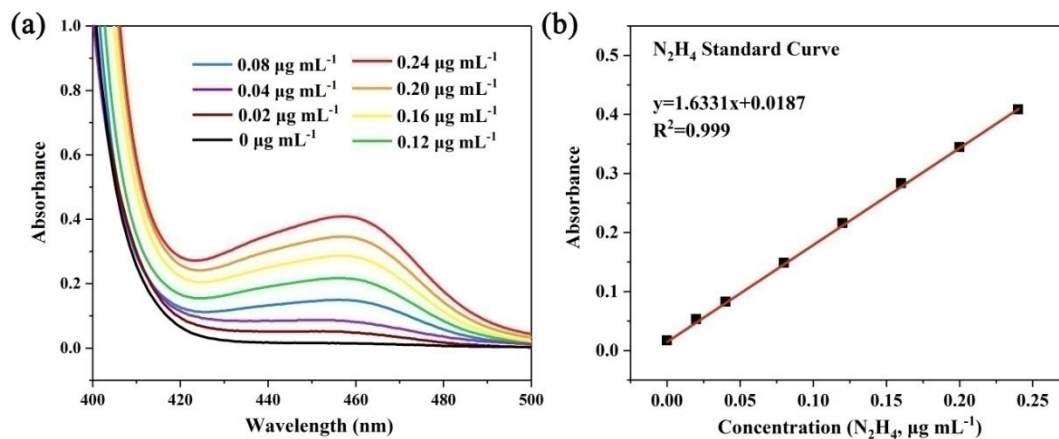

**Figure S10.** (a) UV-Vis absorption curves of various concentrations of  $N_2H_4$  stained with  $p-C_9H_{11}NO$  indicator, (b) A calibration curve used to estimate the concentrations of  $N_2H_4$ .

The fitting curve ( $y = 1.6331x + 0.0187$ ,  $R^2 = 0.999$ ) shows a good linear relation of absorbance value with  $N_2H_4$  concentration.

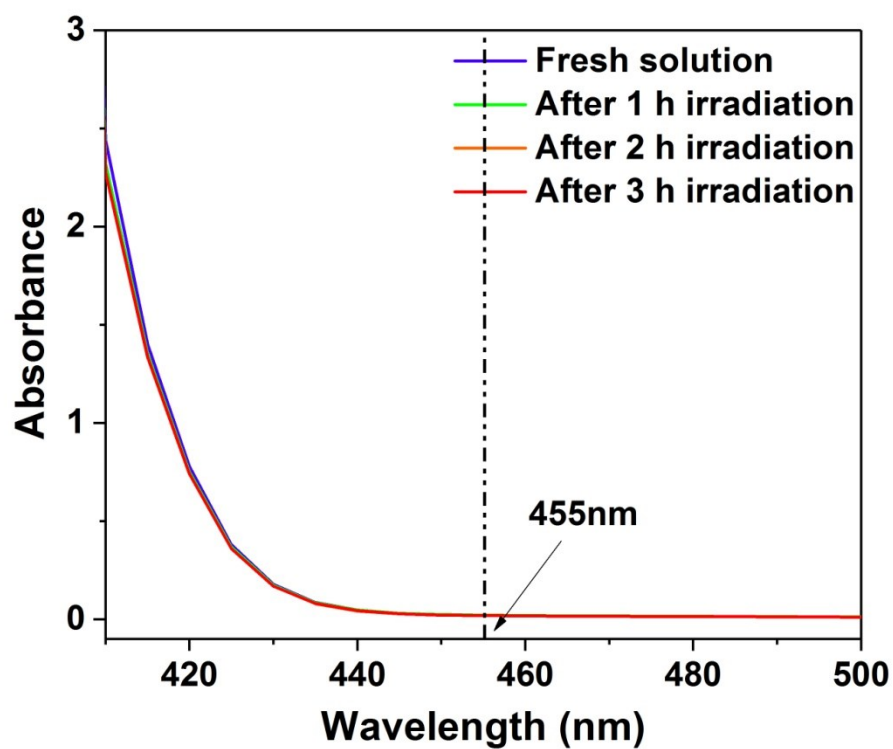

**Figure S11.** UV-Vis absorption spectra of the solution stained with p-C<sub>9</sub>H<sub>11</sub>NO indicator after photocatalytic nitrogen fixation different time.

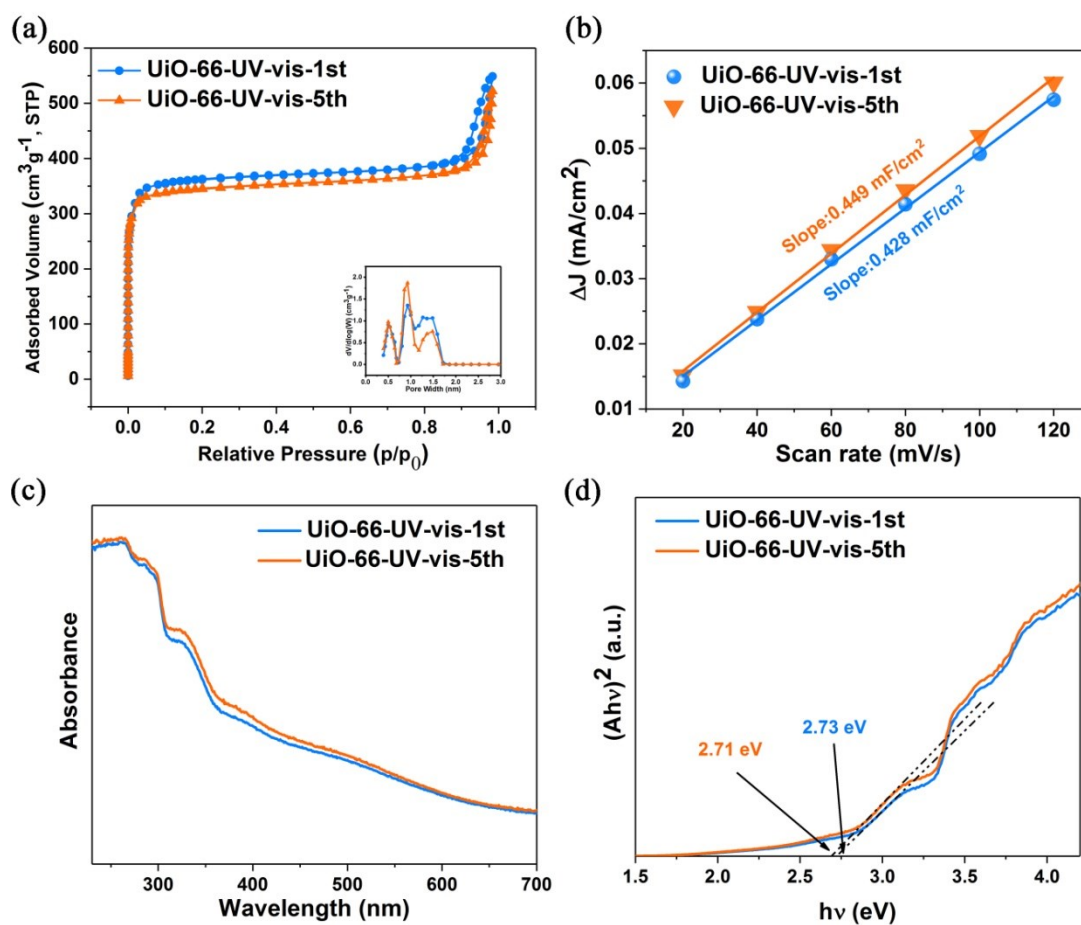

**Figure S12.** (a) N<sub>2</sub> adsorption-desorption isotherms, (b) Plot of the scan rates against the differences in the double layer charging current, (c) UV-vis DRS, and (d) Tauc plots of UiO-66-UV-vis-1st and UiO-66-UV-vis-5th.

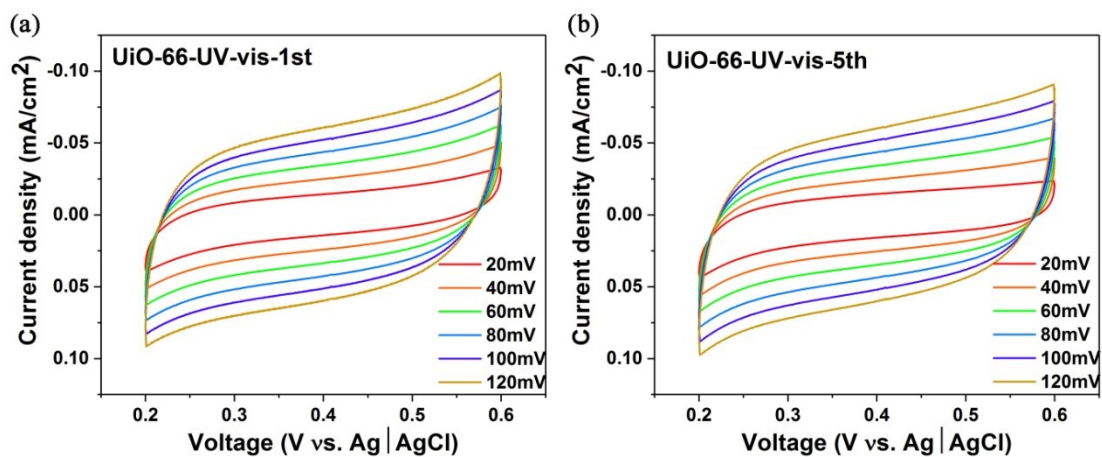

**Figure S13.** The cyclic voltammetry (CV) curves patterns of (a) UiO-66-UV-vis-1st and (b) UiO-66-UV-vis-5th at the scan rates range from 20 to 120 mV/s.

The calculation process is the same as Figure S1.



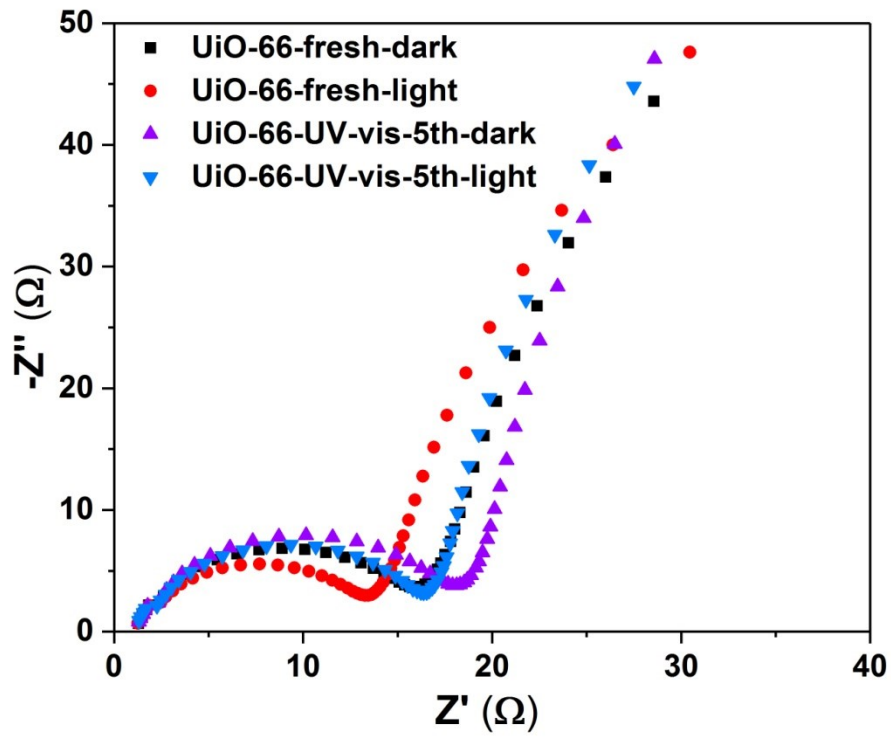

**Figure S14.** Electrochemical impedance spectra (EIS) of UiO-66-fresh and UiO-66-UV-vis-5th under dark and light conditions.

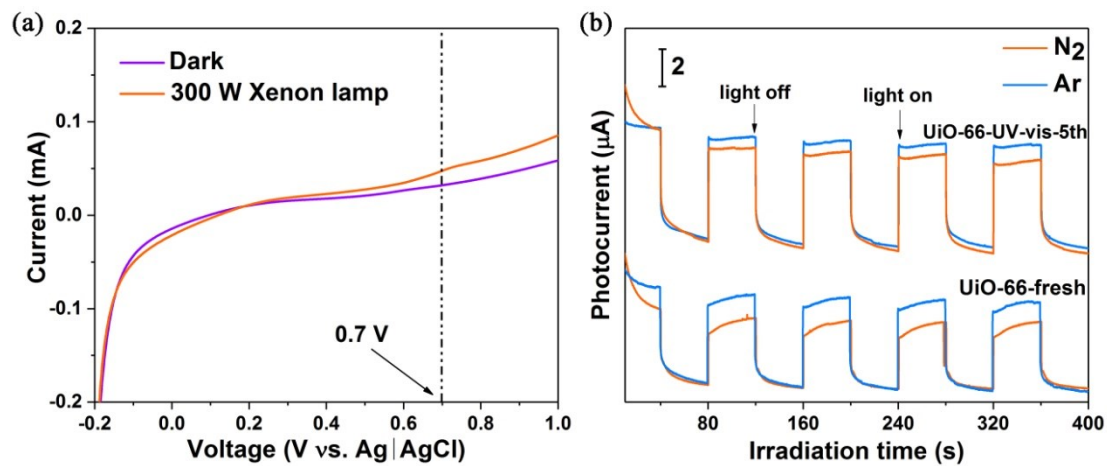

**Figure S15.** (a) Linear sweep voltammetry (LSV) spectra of the UiO-66 under dark condition and 300 W Xenon light irradiation in  $\text{N}_2$  ambient, and (b) Photocurrent spectra of UiO-66-fresh and UiO-66-UV-vis-5th.

Before the photocurrent measurements, the linear sweep voltammetry test was conducted under dark condition and 300 W Xenon light irradiation in  $\text{N}_2$  ambient to determine the bias voltage was 0.7 V.

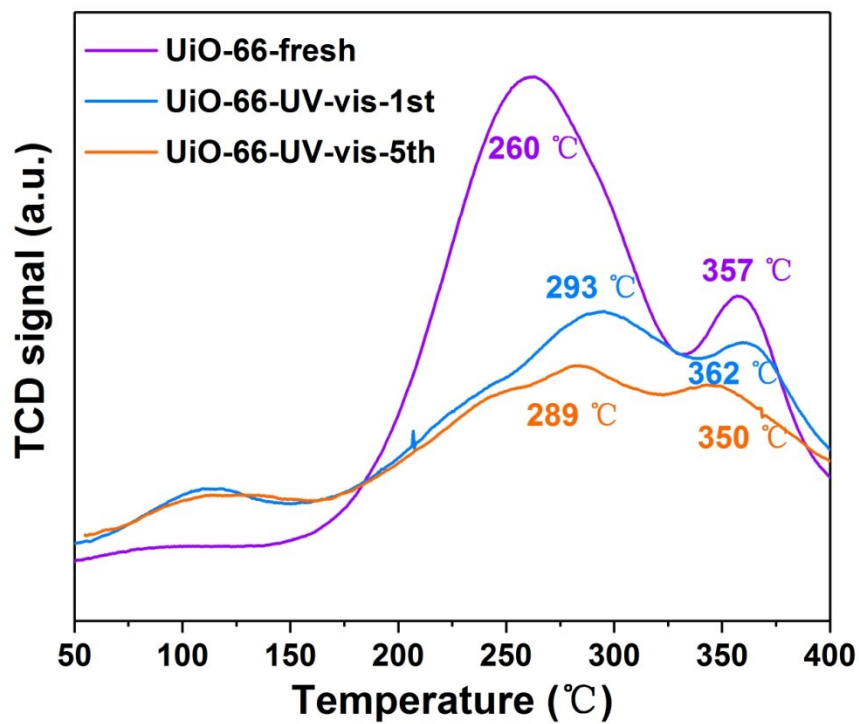

**Figure S16.** N<sub>2</sub>-TPD spectra of UiO-66-fresh, UiO-66-UV-vis-1st, and UiO-66-UV-vis-5th.

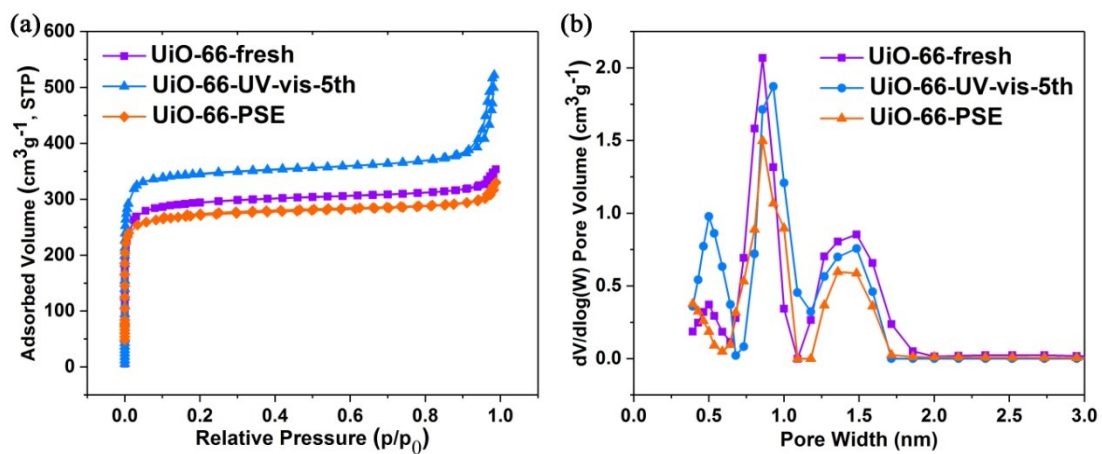

**Figure S17.** (a)  $N_2$  adsorption-desorption isotherms, and (b) pore size distribution curves of UiO-66-fresh and UiO-66-UV-vis-5th and UiO-66-PSE.

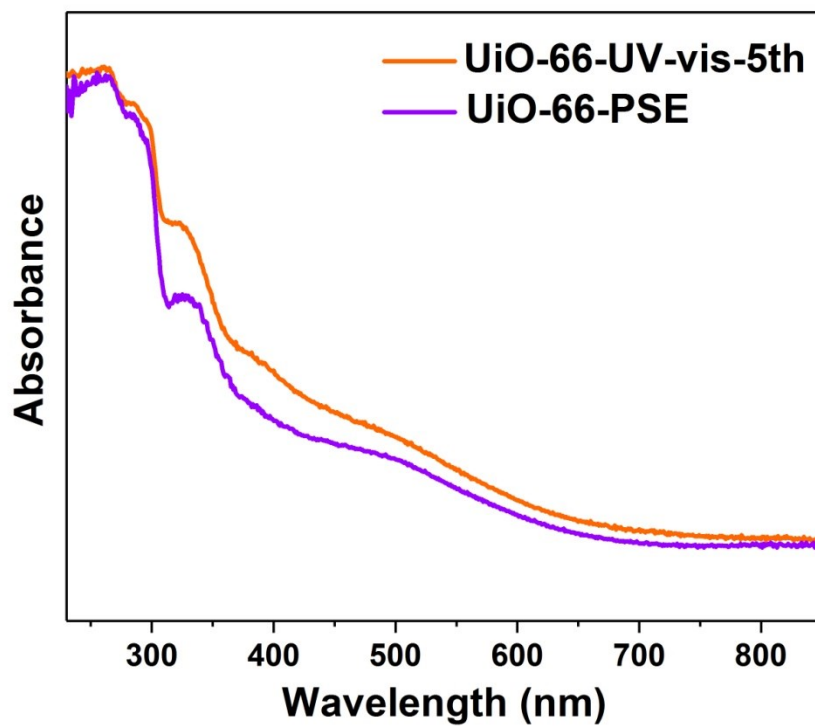

**Figure S18.** The UV-vis diffuse reflectance spectra (UV-vis DRS) of UiO-66-UV-vis-5th and UiO-66-PSE.

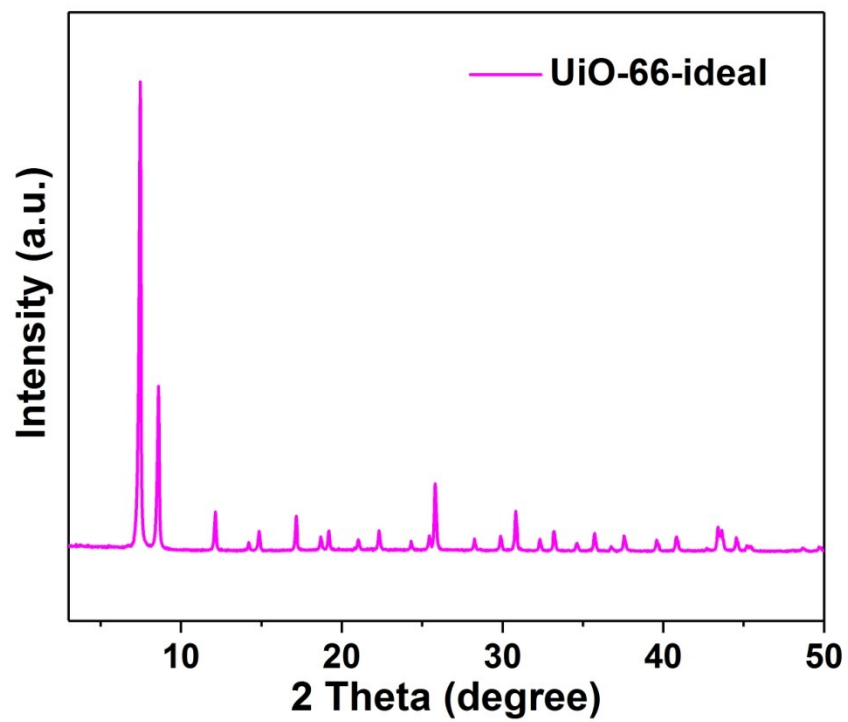

**Figure S19.** XRD pattern of UiO-66-ideal.

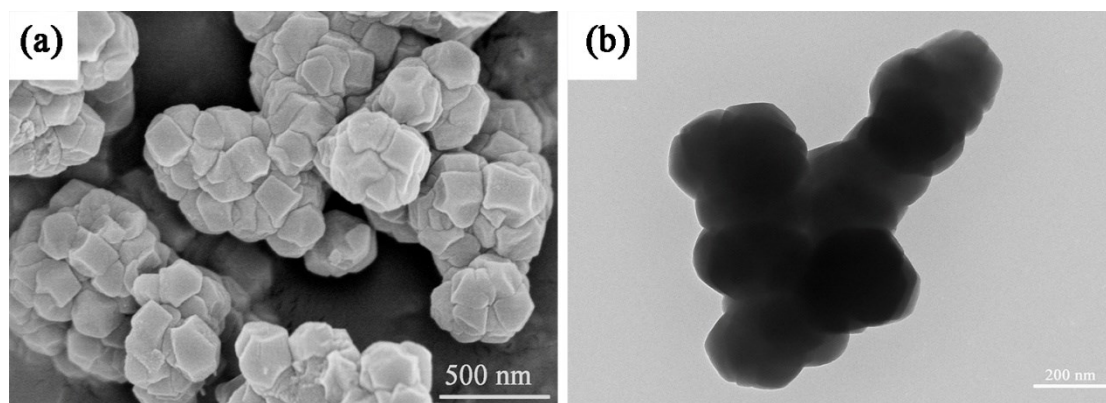

**Figure S20.** (a) Scanning electron microscopy (SEM) images and (b) Transmission electron microscopy (TEM) images of UiO-66-ideal.

---

**Table S1** Comparison of physical properties of the samples

| Photocatalyst                        | Surface area<br>( $\text{m}^2 \cdot \text{g}^{-1}$ ) | Mean pore diameter<br>(nm) | Total pore volume<br>( $\text{cm}^3 \cdot \text{g}^{-1}$ ) |
|--------------------------------------|------------------------------------------------------|----------------------------|------------------------------------------------------------|
| UiO-66-fresh                         | 995                                                  | 2.12                       | 0.416                                                      |
| UiO-66-UV-vis<br>(UiO-66-UV-vis-1st) | 1225                                                 | 2.77                       | 0.519                                                      |
| UiO-66-UV-vis-5th                    | 1144                                                 | 2.82                       | 0.493                                                      |
| UiO-66-ideal                         | 819                                                  | 2.10                       | 0.388                                                      |



**Table S2** Comparison of nitrogen photofixation rate with various MOF photocatalysts

| Photocatalyst                                | Reaction medium                                  | Scavenger                                | Light source                       | Nitrogen source      | NH <sub>3</sub> yield                         | Reference        |
|----------------------------------------------|--------------------------------------------------|------------------------------------------|------------------------------------|----------------------|-----------------------------------------------|------------------|
| <b>UiO-66</b>                                | <b>H<sub>2</sub>O</b>                            | <b>No</b>                                | <b>UV-vis</b><br><b>λ ≥ 420 nm</b> | <b>N<sub>2</sub></b> | <b>256 μmol g<sup>-1</sup> h<sup>-1</sup></b> | <b>This work</b> |
|                                              |                                                  |                                          |                                    | <b>Air</b>           | <b>196 μmol g<sup>-1</sup> h<sup>-1</sup></b> |                  |
|                                              |                                                  |                                          |                                    | <b>N<sub>2</sub></b> | <b>97 μmol g<sup>-1</sup> h<sup>-1</sup></b>  |                  |
|                                              |                                                  |                                          |                                    | <b>Air</b>           | <b>70 μmol g<sup>-1</sup> h<sup>-1</sup></b>  |                  |
| Ti <sub>3</sub> C <sub>2</sub> -QD/Ni-MOF    | H <sub>2</sub> O+ NaSO <sub>3</sub>              | 1 mM NaSO <sub>3</sub>                   | UV-vis                             | N <sub>2</sub>       | 88.79 μmol g <sup>-1</sup> h <sup>-1</sup>    | 1                |
| MIL-53 (Fe II/Fe III)                        | H <sub>2</sub> O+ K <sub>2</sub> SO <sub>3</sub> | 0.158 g/L K <sub>2</sub> SO <sub>3</sub> | λ ≥ 420 nm                         | N <sub>2</sub>       | 306 μmol g <sup>-1</sup> h <sup>-1</sup>      | 2                |
| Gd-IHEP-7                                    | H <sub>2</sub> O                                 | No                                       | UV-vis                             | N <sub>2</sub>       | 128 μmol g <sup>-1</sup> h <sup>-1</sup>      | 3                |
| Gd-IHEP-8                                    |                                                  |                                          |                                    |                      | 220 μmol g <sup>-1</sup> h <sup>-1</sup>      |                  |
| g-C <sub>3</sub> N <sub>4</sub> /MOF-74 (Zn) | H <sub>2</sub> O+ Methanol                       | Methanol (4% wt)                         | λ ≥ 400 nm                         | Air                  | 1.7 mmol g <sup>-1</sup> h <sup>-1</sup>      | 4                |
| MIL-101 (Fe)                                 | H <sub>2</sub> O                                 | No                                       | UV-vis                             | N <sub>2</sub>       | 100 μmol g <sup>-1</sup> h <sup>-1</sup>      | 5                |
| NH <sub>2</sub> -MIL-125 (Ti)                | H <sub>2</sub> O                                 | No                                       | λ ≥ 400 nm                         | N <sub>2</sub>       | 12.25 μmol g <sup>-1</sup> h <sup>-1</sup>    | 6                |
| Ce-MOF                                       | H <sub>2</sub> O                                 | No                                       | UV-vis                             | N <sub>2</sub>       | 34 μmol g <sup>-1</sup> h <sup>-1</sup>       | 7                |

---

## References:

- 1 J. Z. Qin, B. J. Liu, K.-H. Lam, S. J. Song, X. Y. Li and X. Hu, *ACS Sustain. Chem. Eng.*, 2020, **8**, 17791-17799.
- 2 Z. F. Zhao, D. Yang, H. J. Ren, K. An, Y. Chen, Z. Y. Zhou, W. J. Wang and Z. Y. Jiang, *Chem. Eng. J.*, 2020, **400**, 125929.
- 3 K. Q. Hu, P. X. Qiu, L. W. Zeng, S. X. Hu, L. Mei, S. W. An, Z. W. Huang, X. H. Kong, J. H. Lan, J. P. Yu, Z. H. Zhang, Z. F. Xu, J. K. Gibson, Z. F. Chai, Y. F. Bu and W. Q. Shi, *Angew. Chem. Int. Edit.*, 2020, **59**, 20666-20671.
- 4 Z. Ding, S. Wang, X. Chang, D. H. Wang and T. H. Zhang, *RSC Adv.*, 2020, **10**, 26246-26255.
- 5 G. Q. Li, F. F. Li, J. X. Liu and C. M. Fan, *J. Solid State Chem.*, 2020, **285**, 121245.
- 6 H. Huang, X. S. Wang, D. Philo, F. Ichihara, H. Song, Y. X. Li, D. Li, T. Qiu, S. Y. Wang and J. H. Ye, *Appl. Catal. B*, 2020, **267**, 118686.
- 7 C. Zhang, Y. Xu, C. Lv, X. Zhou, Y. Wang, W. Xing, Q. Meng, Y. Kong and G. Chen, *ACS Appl. Mater. Inter.*, 2019, **11**, 29917-29923.
